# Supplementary material for: Acidic pH increases airway surface liquid viscosity in cystic fibrosis
Source: JCI journal article supplement (doi:10.1172/jci83922), 2016-01-24
Supplement: sd1 [file 1]

## **SUPPLEMENTAL MATERIAL**

### **Acidic pH Increases Airway Surface Liquid Viscosity in Cystic Fibrosis**

Authors: Xiao Xiao Tang, Lynda S Ostedgaard, Mark J Hoegger, Thomas O Moninger, Philip H Karp, James D McMenimen, Biswa Choudhury, Ajit Varki, David A Stoltz, Michael J Welsh

| <b><u>Ratio (Glycan/Gal)</u></b> | <b><u>non-CF</u></b> | <b><u>CF</u></b> | <b><u>P Value</u></b> |
|----------------------------------|----------------------|------------------|-----------------------|
| (Neu5Ac+Neu5Gc)/Gal              | 0.68±0.15            | 0.75±0.13        | 0.75                  |
| Fuc/Gal                          | 0.62±0.21            | 0.47±0.13        | 0.43                  |
| GalNH <sub>2</sub> /Gal          | 0.52±0.07            | 0.38±0.05        | 0.19                  |
| GlcNH <sub>2</sub> /Gal          | 1.64±0.22            | 1.40±0.06        | 0.36                  |
| Gal/Gal                          | 1.00                 | 1.00             | -                     |
| Man/Gal                          | 1.10±0.40            | 1.04±0.36        | 0.68                  |

| <b><u>Ratio (Glycan/Man)</u></b> | <b><u>non-CF</u></b> | <b><u>CF</u></b> | <b><u>P Value</u></b> |
|----------------------------------|----------------------|------------------|-----------------------|
| (Neu5Ac+Neu5Gc)/Man              | 1.35±0.63            | 3.25±2.35        | 0.34                  |
| Fuc/Man                          | 0.97±0.32            | 0.87±0.33        | 0.78                  |
| GalNH <sub>2</sub> /Man          | 1.31±0.58            | 1.31±0.74        | 0.99                  |
| GlcNH <sub>2</sub> /Man          | 3.90±1.68            | 4.25±2.25        | 0.75                  |
| Gal/Man                          | 3.21±1.64            | 3.22±1.82        | 1.00                  |
| Man/Man                          | 1.00                 | 1.00             | -                     |

| <b><u>Ratio (Glycan/GalNH<sub>2</sub>)</u></b> | <b><u>non-CF</u></b> | <b><u>CF</u></b> | <b><u>P Value</u></b> |
|------------------------------------------------|----------------------|------------------|-----------------------|
| (Neu5Ac+Neu5Gc)/GalNH <sub>2</sub>             | 1.25±0.19            | 2.13±0.42        | 0.07                  |
| Fuc/GalNH <sub>2</sub>                         | 1.09±0.26            | 1.27±0.30        | 0.46                  |
| GalNH <sub>2</sub> /GalNH <sub>2</sub>         | 1.00                 | 1.00             | -                     |
| GlcNH <sub>2</sub> /GalNH <sub>2</sub>         | 3.24±0.34            | 4.03±0.72        | 0.35                  |
| Gal/GalNH <sub>2</sub>                         | 2.07±0.25            | 2.93±0.58        | 0.28                  |
| Man/GalNH <sub>2</sub>                         | 1.96±0.73            | 3.45±1.61        | 0.23                  |

**Table S1. Monosaccharides in non-CF and CF ASL.** ASL was removed from non-CF and CF piglets after methacholine administration. Monosaccharides were determined by high-performance anion-exchange chromatography with pulsed amperometric detection (HPAE-PAD). N=5 per genotype, each from a different pig; littermate controls were used. Data are mean±SEM. P values were by unpaired Student's t-test. Monosaccharides were normalized to galactose (Gal), mannose (Man), and galactosamine (GalNH<sub>2</sub>) levels.

**Table S1**

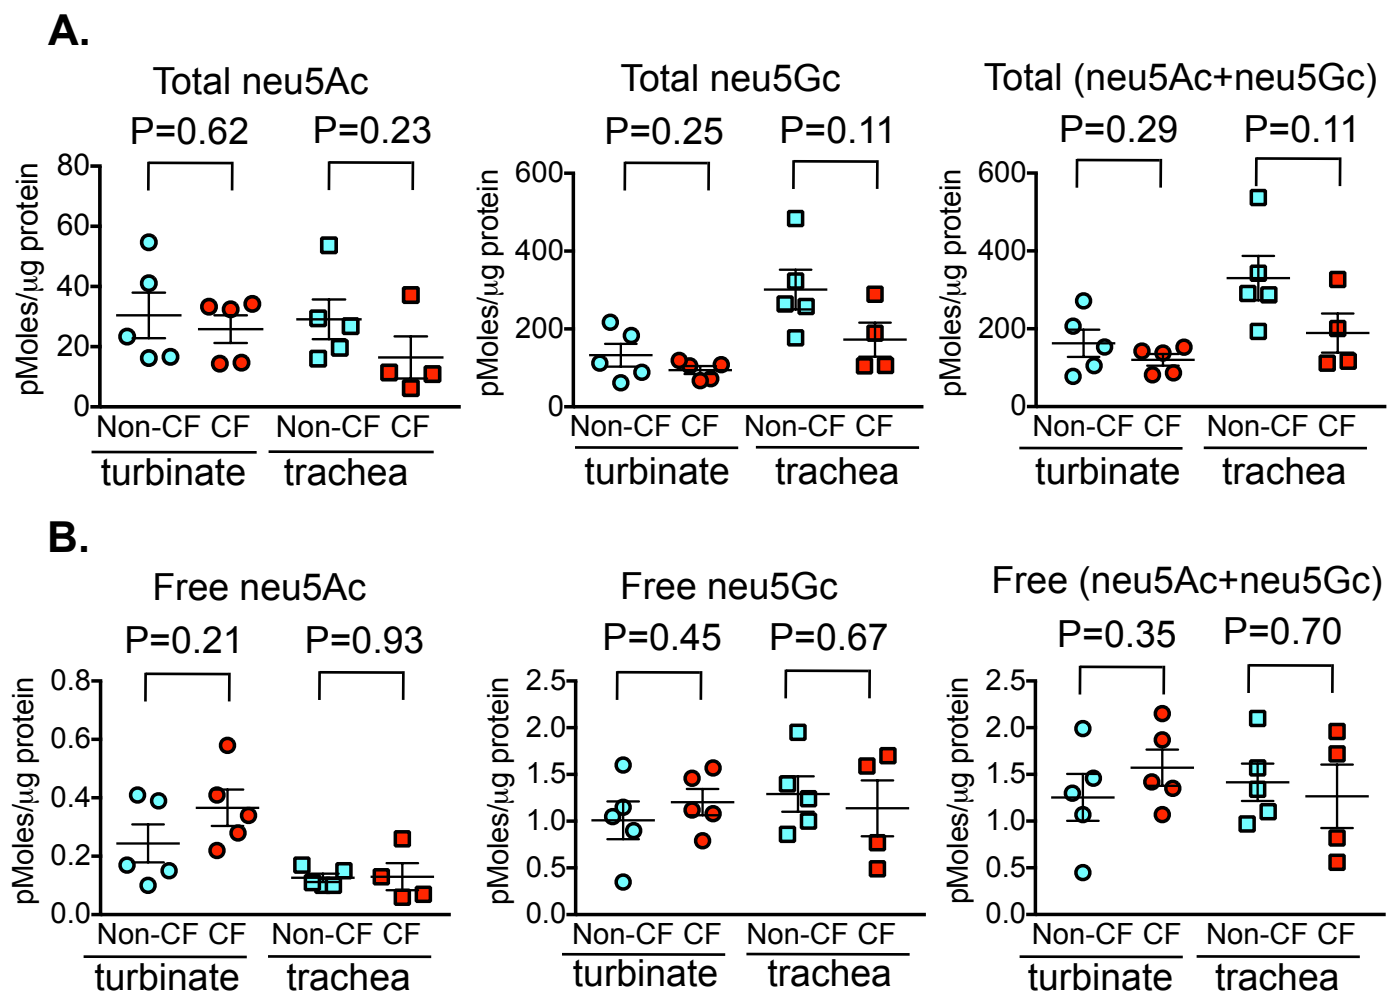

**Figure S1. Total and free sialic acid in ASL from cultured nasal and tracheal epithelia.**

Total (A) and free (B) sialic acids (neu5Ac and neu5Gc) in ASL from cultured airway epithelia were determined by HPAE-PAD. N=4-5 per genotype, each from a different pig. Bars indicate means ± SEM. P values were by unpaired Student's t-test.

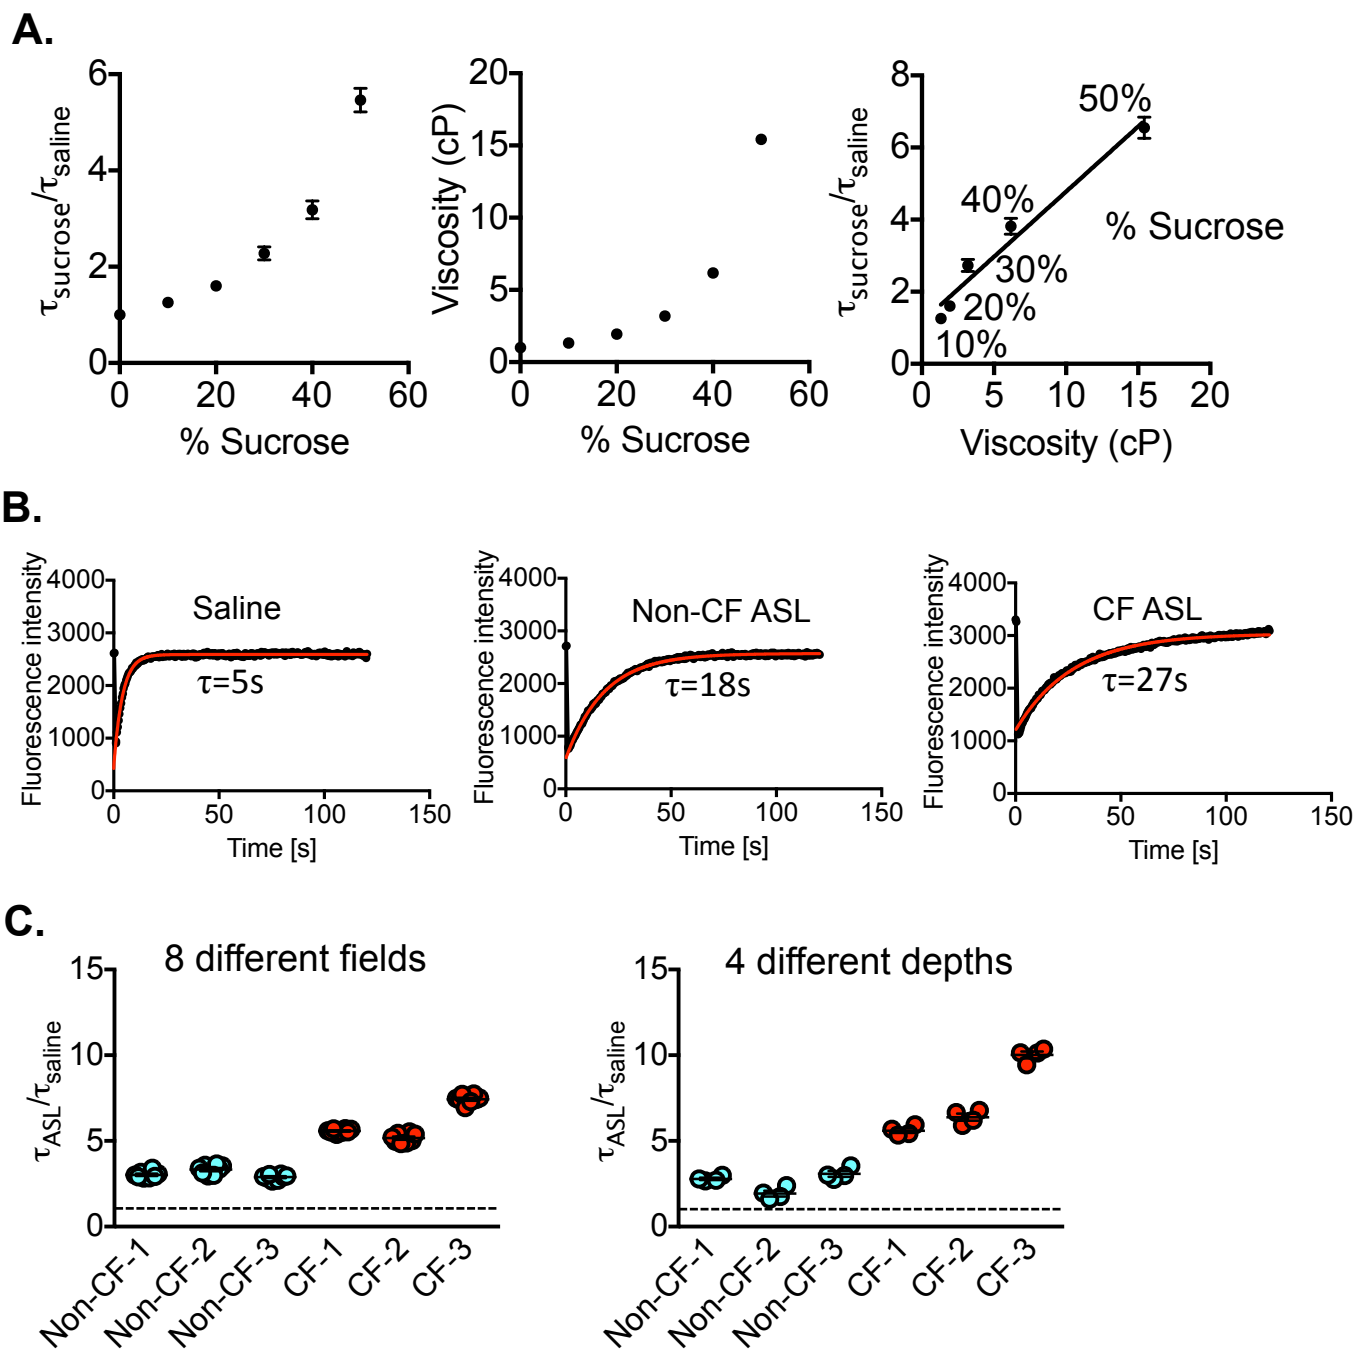

**Figure S2. Fluorescence recovery after photobleaching (FRAP) to assess ASL viscosity.** (A)  $\tau_{\text{sucrose}}/\tau_{\text{saline}}$  (left) by FRAP and viscosity (middle) determined by cone and plate viscometer (DR Lide, CRC Handbook of Chemistry and Physics. CRC Press. 2000.) for solutions containing increasing sucrose concentrations. Comparison of  $\tau_{\text{sucrose}}/\tau_{\text{saline}}$  and viscosity (right).  $N=4$  per condition;  $R^2=0.94$ ,  $*P<0.0001$ . (B) Representative FRAP traces (black) with the fitted line (red) for saline and for ASL of non-CF and CF cultured airway epithelia. (C)  $\tau_{\text{ASL}}/\tau_{\text{saline}}$  measured in 8 different microscopic fields (left panel) and 4 different depths (right panel) in CF and non-CF cultured airway epithelia ( $N=3$  epithelia per group, each from a different pig). Bars indicate means $\pm$ SEM.

**Fig. S2**

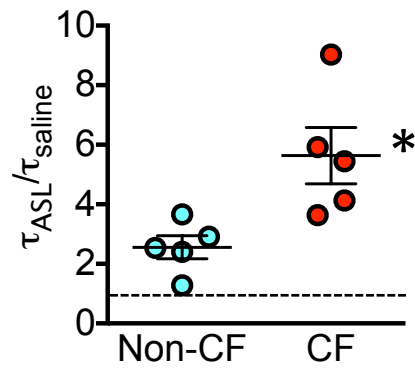

**Figure S3. ASL viscosity in differentiated primary airway epithelial cultures apically washed 1 week before measurement.** N=5 per genotype, each from a different pig. Bars indicate means $\pm$ SEM. Asterisk indicates P<0.05 by unpaired Student's t-test.

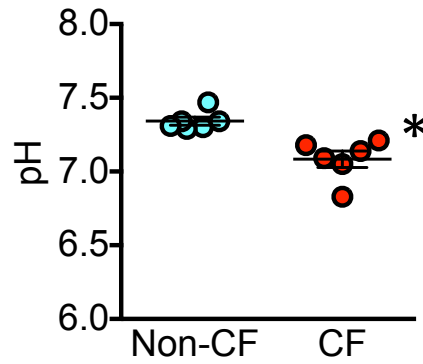

**Figure S4. ASL pH in differentiated primary airway epithelia cultured from non-CF and CF humans.** N=6 cultures per genotype, each from a different human donor. Bars indicate means $\pm$ SEM. Asterisk indicates  $P < 0.05$  by unpaired Student's t-test. See also Fig. 2C.

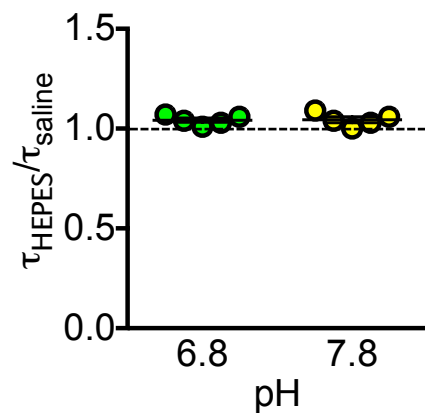

**Figure S5. Viscosity of HEPES buffer at different pH.**  $\tau_{\text{HEPES}}/\tau_{\text{saline}}$  of 20 mM HEPES buffer in saline at pH 6.8 and 7.8. Bars indicate means $\pm$ SEM. See also Fig. 5D.

**Fig. S5**

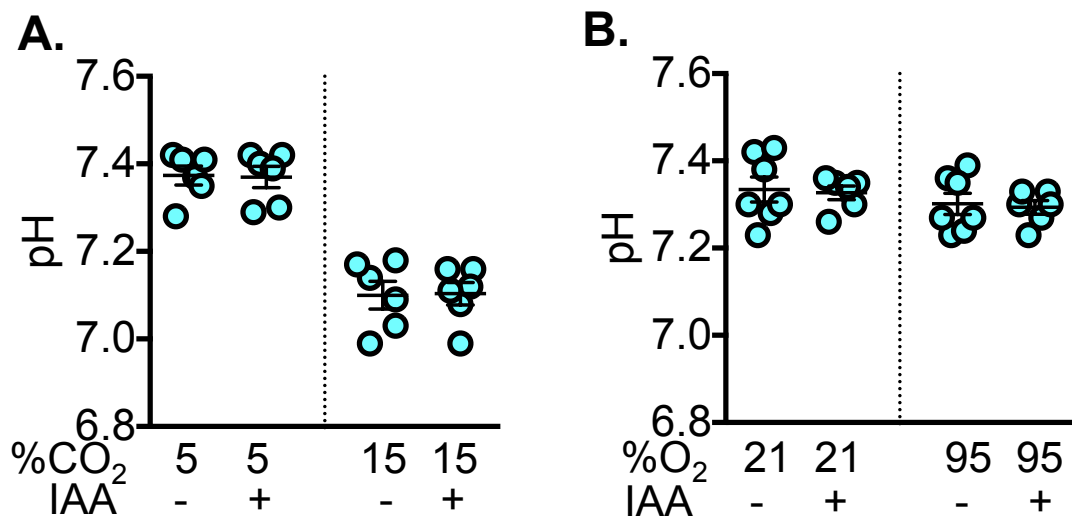

**Figure S6. Effect of iodoacetamide (IAA) on ASL pH of cultured non-CF airway epithelia.**

**(A)** 25 mM iodoacetamide (IAA) was added to non-CF airway epithelia exposed to 5% or 15% CO<sub>2</sub>. N=6 epithelia per condition, each from a different pig. See also Fig. 6C. **(B)** 25 mM IAA was added to non-CF airway epithelia exposed to 21% or 95% O<sub>2</sub>. N=6-7 epithelia per condition, each from a different pig. See also Fig. 6D. Bars indicate means±SEM.



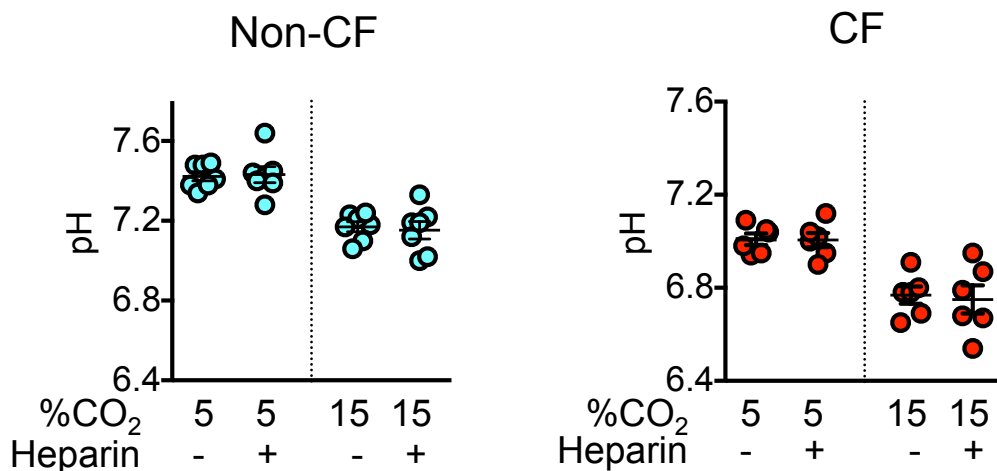

**Figure S7. Effect of heparin on ASL pH of non-CF and CF cultured airway epithelia.**

Heparin (1 mg/ml in 3  $\mu$ l of PBS) was added to ASL of non-CF or CF cultured airway epithelia exposed to 5 or 15% CO<sub>2</sub>. N=6 or 7 per condition, each from a different pig. See also Fig. 7A.

Bars indicate means $\pm$ SEM.

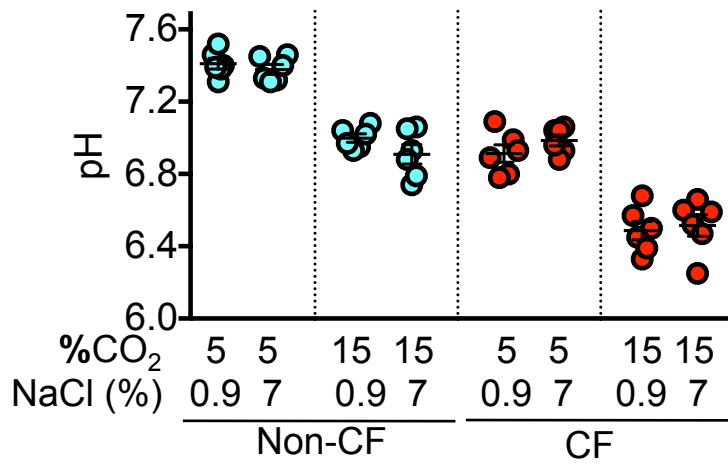

**Figure S8. Effect of 0.9% and 7% NaCl on pH of ASL collected from newborn non-CF and CF pigs.** 4  $\mu$ l of 0.9% or 7% NaCl was added to 10  $\mu$ l ASL collected from non-CF and CF newborn pigs simulated with methacholine. ASL was exposed to 5% or 15% CO<sub>2</sub>. N=6 per condition, each from a different pig. See also Fig. 7B. Bars indicate means $\pm$ SEM.

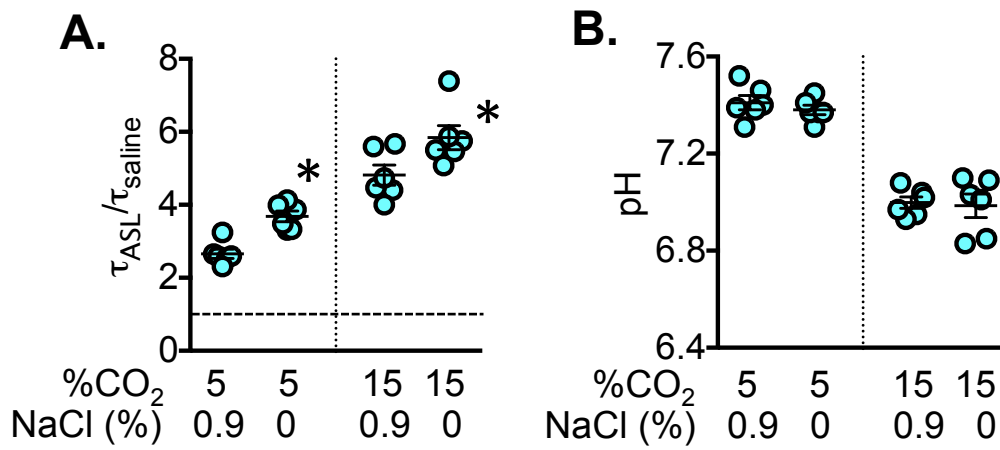

**Figure S9. Effect of 0% and 0.9% NaCl on  $\tau_{ASL}/\tau_{saline}$  and pH of ASL from non-CF newborn pigs.** 4  $\mu$ l of 0.9% NaCl or water was added to 10  $\mu$ l ASL collected from newborn non-CF pigs stimulated with methacholine. ASL was exposed to 5% or 15% CO<sub>2</sub>. N=6 per condition, each from a different pig. Bars indicate means $\pm$ SEM. Asterisk indicates P<0.05 by unpaired Student's t-test.

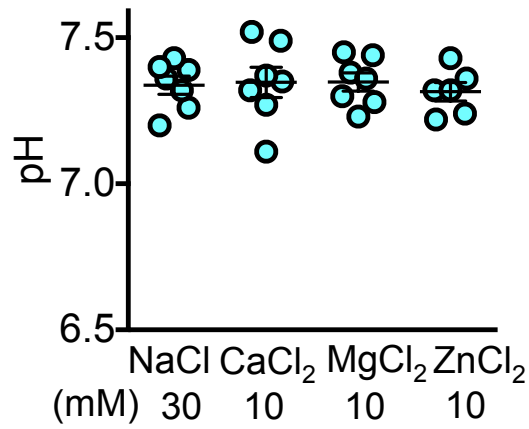

**Figure S10. Effect of divalent cations on ASL pH.** 30 mM NaCl, 10 mM CaCl<sub>2</sub>, 10 mM MgCl<sub>2</sub> or 10 mM ZnCl<sub>2</sub> in saline (20 mM HEPES, pH 7.35) was added to ASL removed from newborn non-CF pigs. N=6-7 per condition, each from a different pig. See also Fig. 8B. Bars indicate means  $\pm$  SEM.

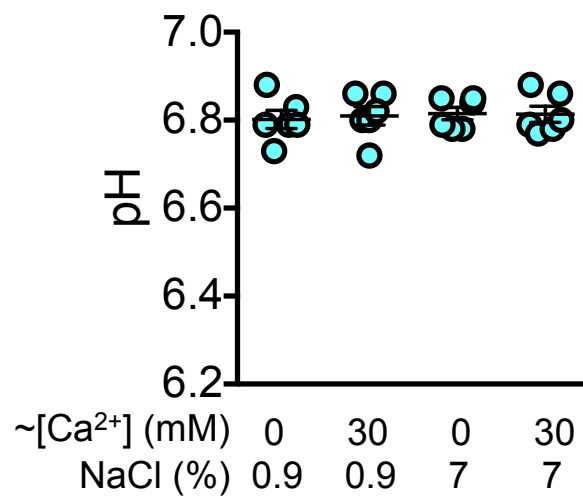

**Figure S11. Effect of 0.9% NaCl, 7% NaCl, EGTA and  $\text{CaCl}_2$  on ASL pH.** ASL was collected from newborn non-CF piglets and studied after addition of 20 mM EGTA (0 mM  $\text{Ca}^{2+}$ ), or 100 mM  $\text{CaCl}_2$  (30 mM  $\text{Ca}^{2+}$  calculated as described for panel A in Fig. 8). Additions were in 4  $\mu\text{l}$  of 0.9% or 7% NaCl containing 20 mM HEPES at pH 6.8. N=6 per condition, each from a different pig. See also Fig. 8C. Bars indicate means $\pm$ SEM.
